# Supplementary material for: The immunopeptidome landscape associated with T cell infiltration, inflammation and immune editing in lung cancer
Source: PubMed Central journal article supplement (PMC10212769; doi:10.1038/s43018-023-00548-5), 2023-05-01

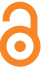

---

# The immunopeptidome landscape associated with T cell infiltration, inflammation and immune editing in lung cancer

---

In the format provided by the authors and unedited



Supplementary Figure 1:

GeoMx ROIs per patient. Selection of defined micro-regions (i.e. regions of interest, ROI) that were selected manually without independent repetition and subjected to spatial analyses (91-plex GeoMx Protein Assay and the Cancer Transcriptome Atlas Design RNA-GeoMx). According to the morphological differences and the above markers, the selected micro-regions were annotated when applicable as either 1. tumoral 2. necrotic, 3. Stroma (with variable contributions of tumor cells and immune cells), 4. CD45+ immune cell rich regions, 5. tertiary lymphoid structures (TLS), and 6. other regions (including blood vessels and non-malignant lung). High resolution images are available upon request.

02287

Green - PanCK  
Yellow - CD45  
Blue - Nuclei

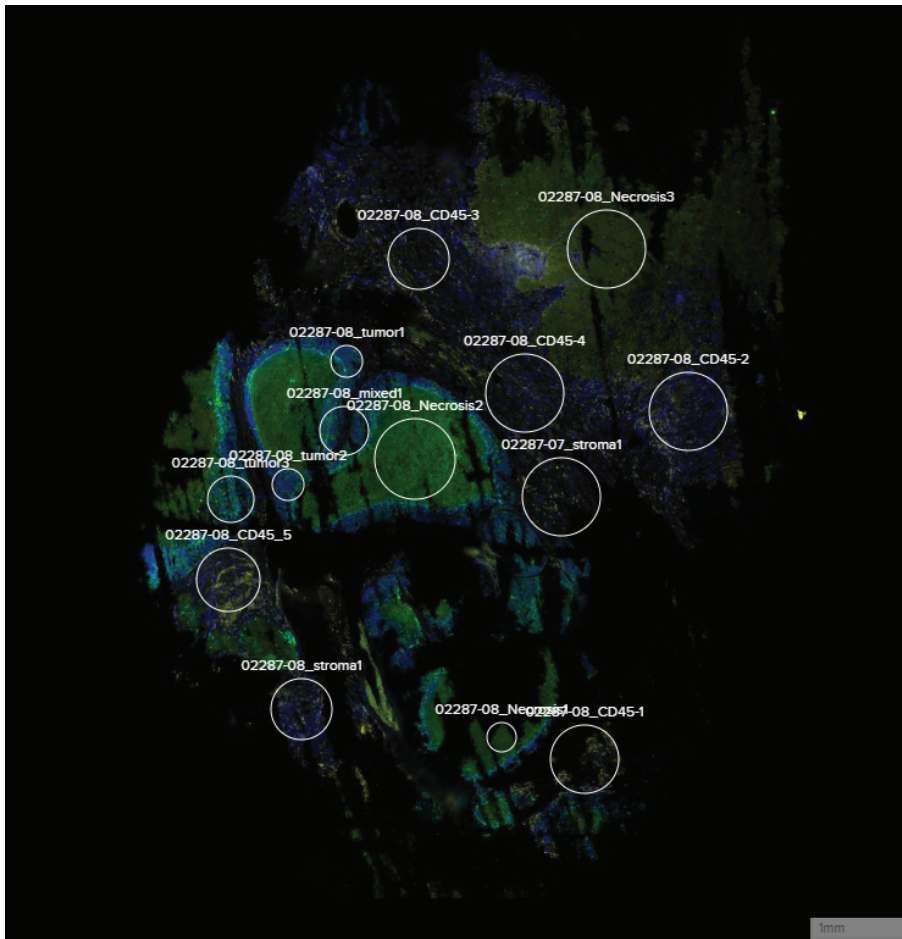

1mm

CD45.9

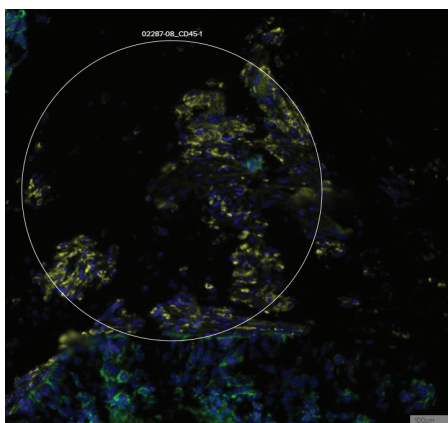

CD45.3

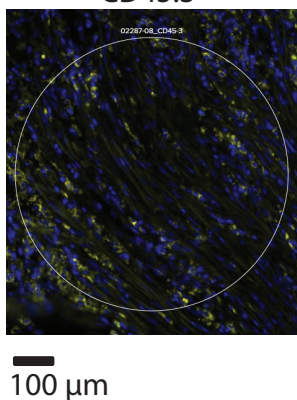

CD45.4

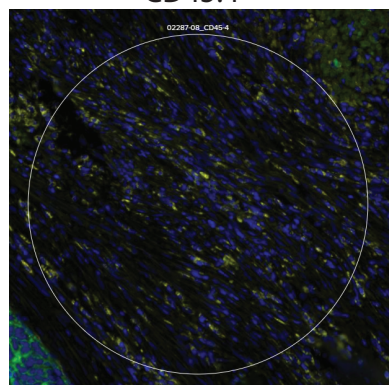

necrosis.2

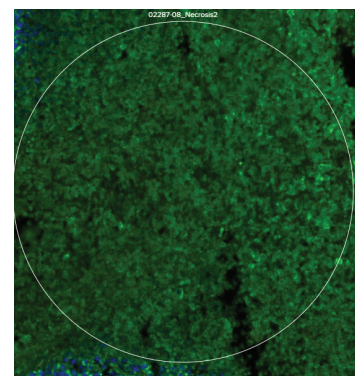

necrosis.3

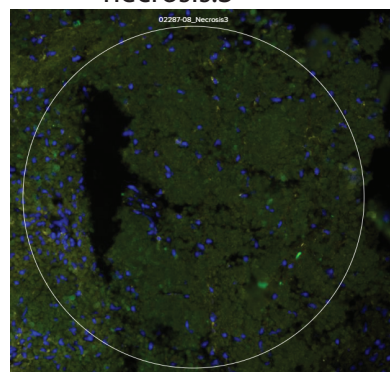

stroma.4

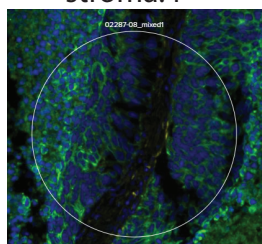

tumor.3

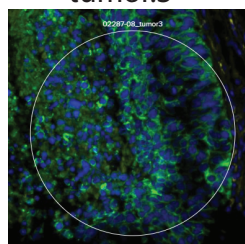

stroma.1

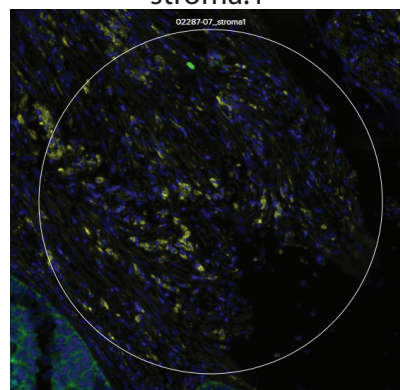

tumor.2

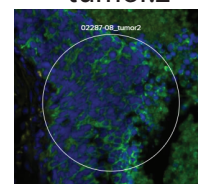

necrosis.1

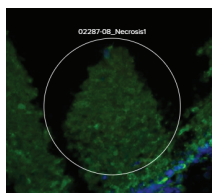

tumor.1

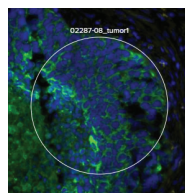

CD45.5

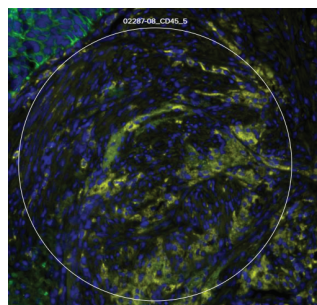

CD45.2

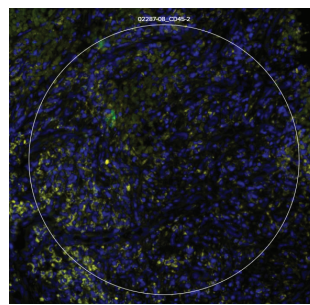

CD45.1

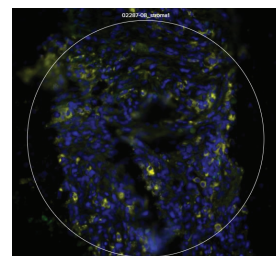



02288

Green - PanCK  
Yellow - CD45  
Blue - Nuclei

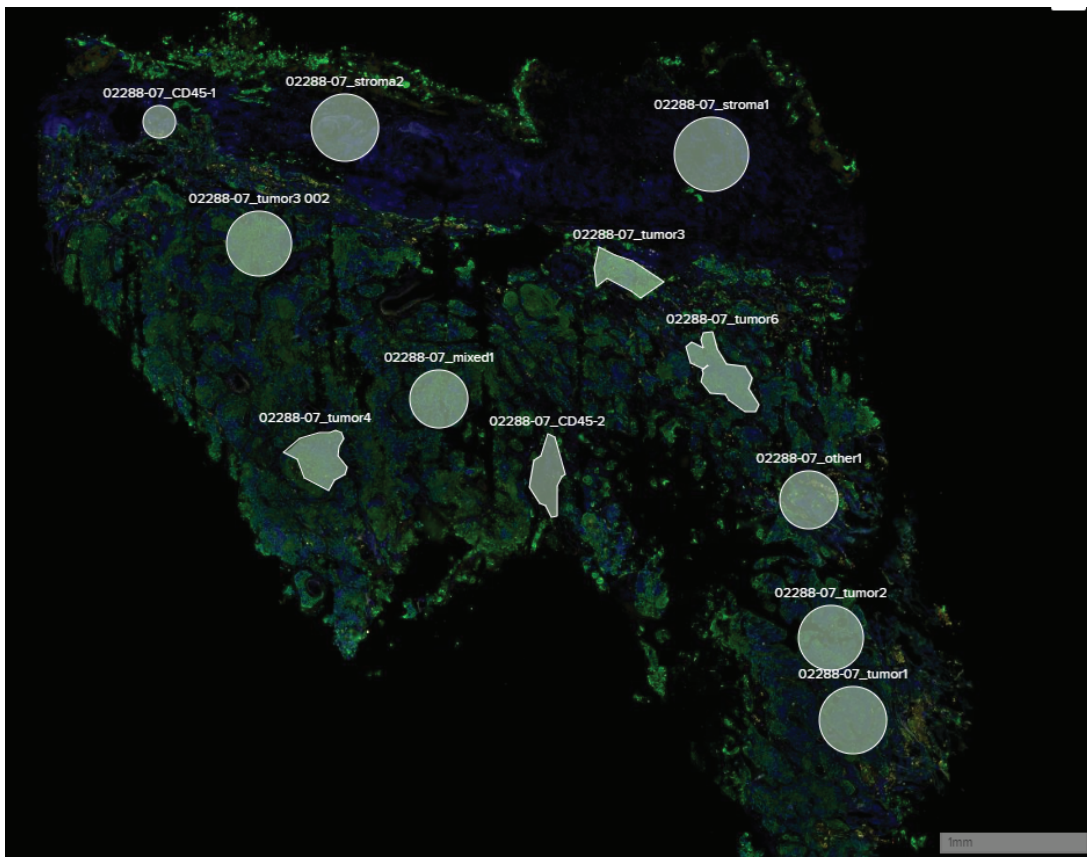

tumor.3 002

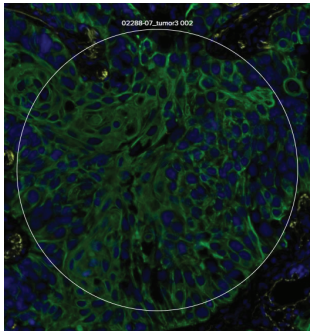

stroma.2

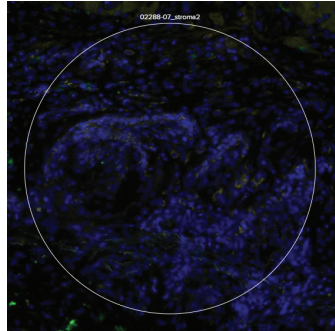

tumor.6

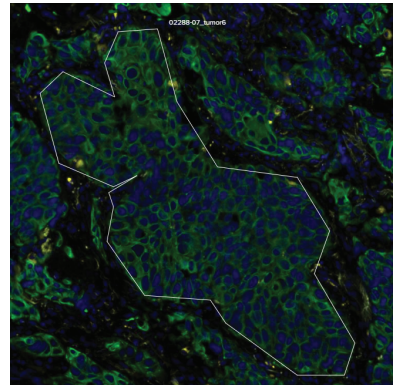

CD45.1

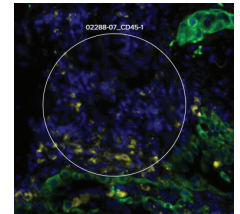

tumor.2

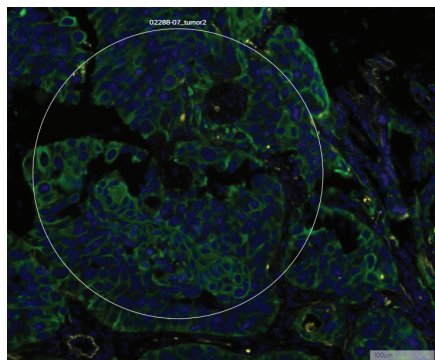

CD45.1

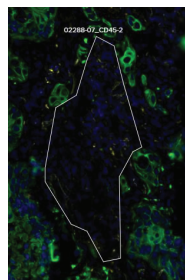

tumor.8

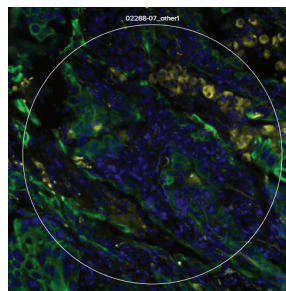

stroma.1

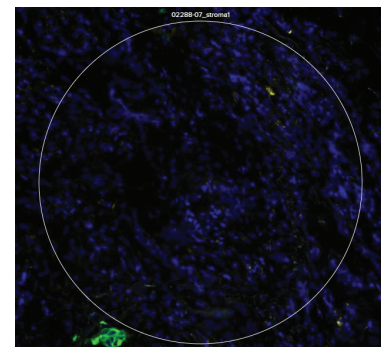

tumor.3

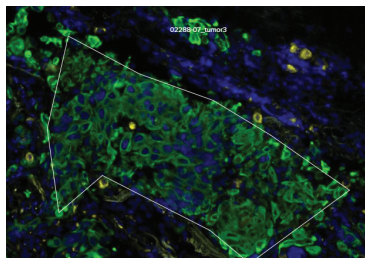

tumor.9

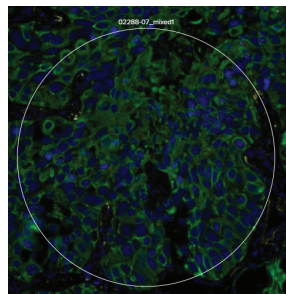

tumor.1

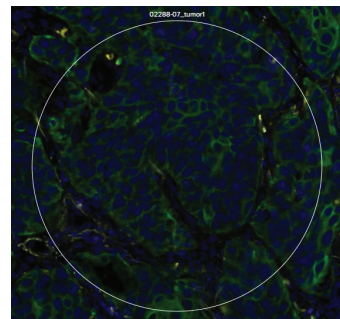

tumor.4

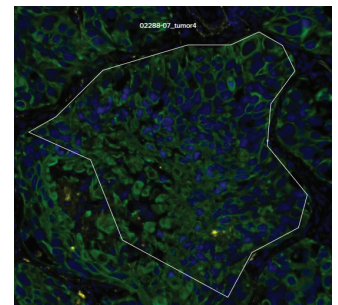



02289

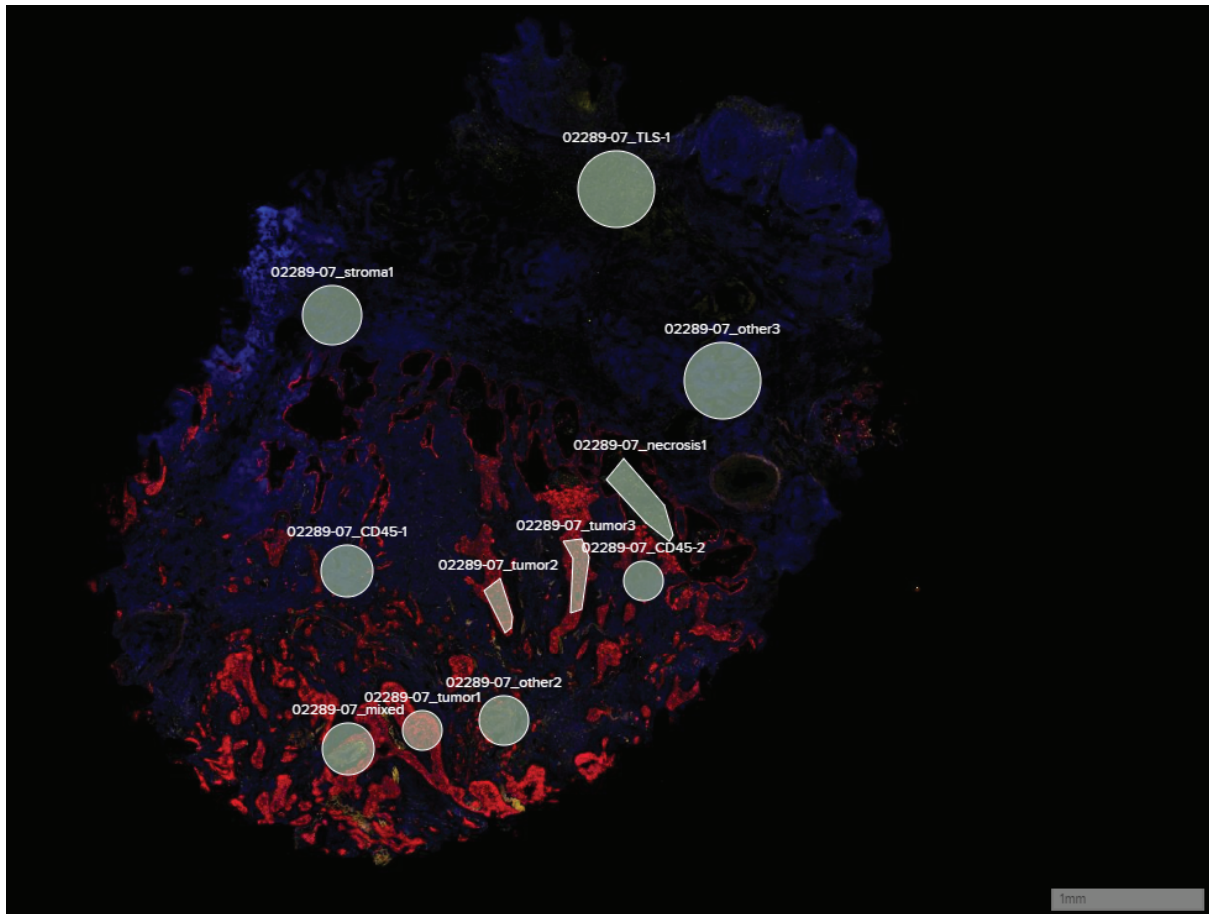

Green - PanCK  
Yellow - CD45  
Blue - Nuclei

1mm

stoma.1

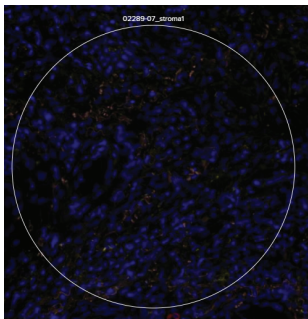

tumor.2

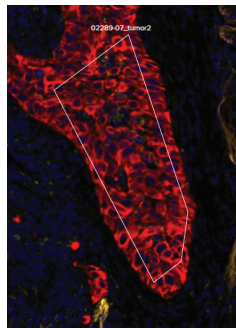

tumor.3

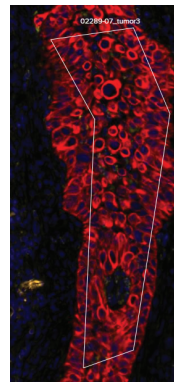

necrosis.1

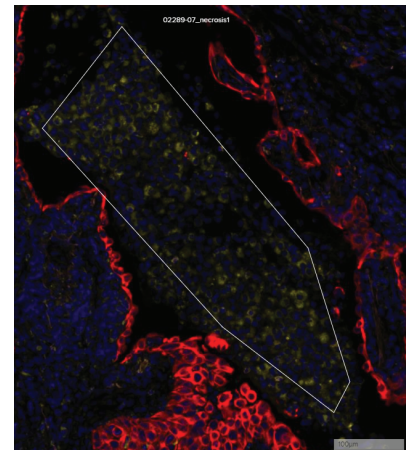

other.3

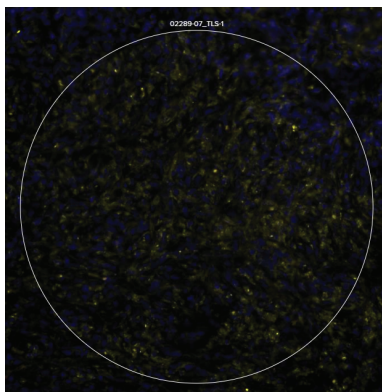

tumor.1

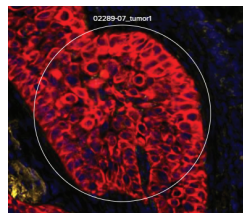

stroma.2

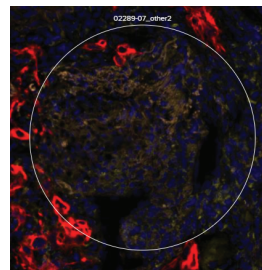

100 μm

stroma.9

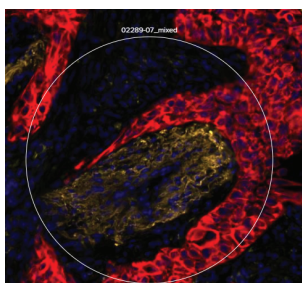

CD45.2

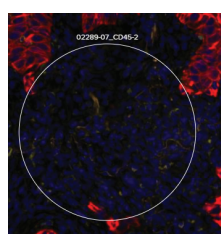

CD45.1

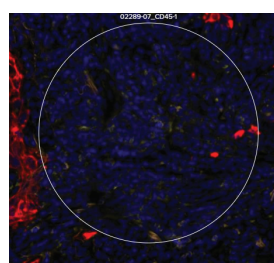

other.3

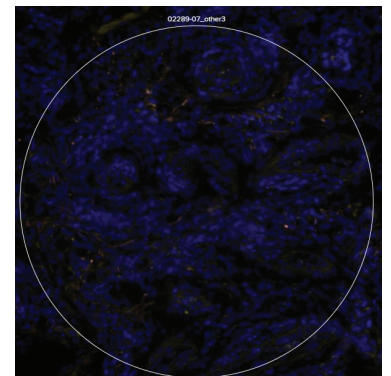



02290

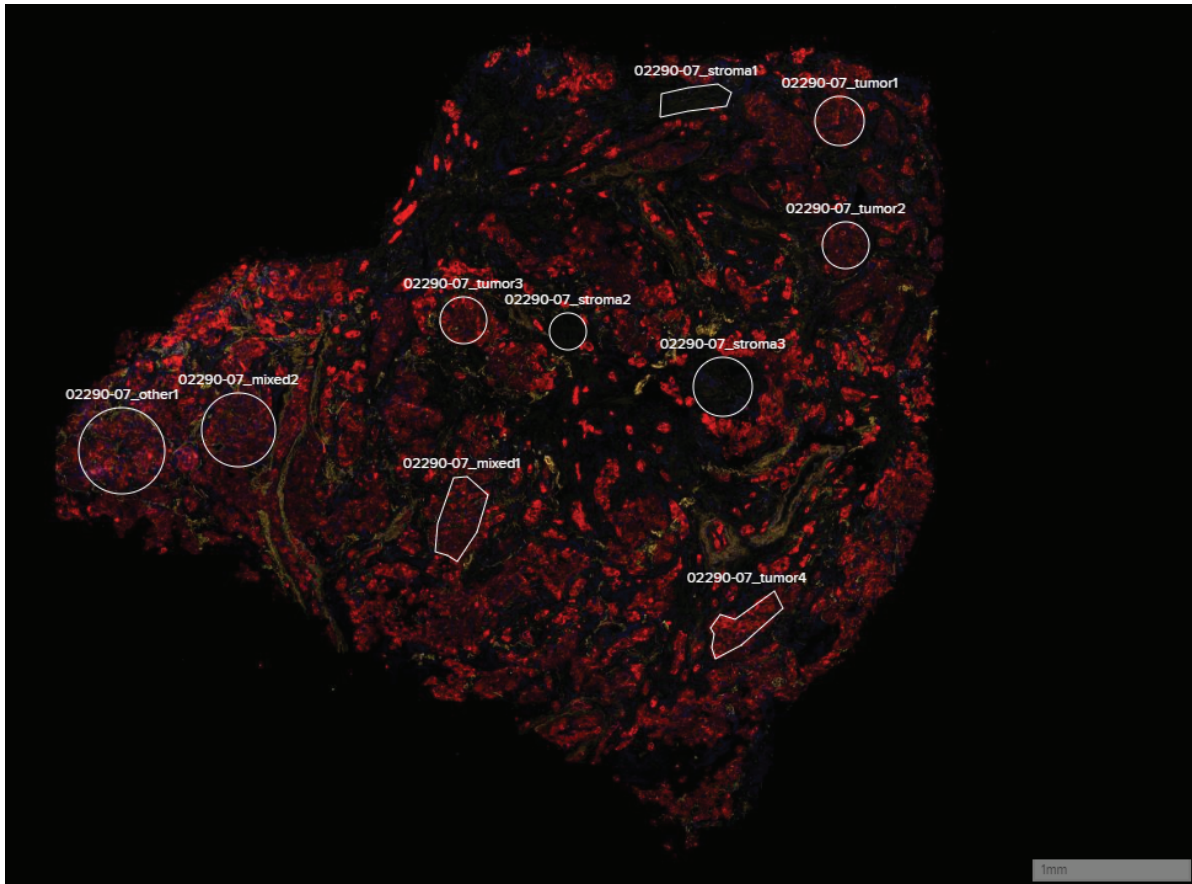

Green - PanCK  
Yellow - CD45  
Blue - Nuclei

1mm

tumor.4

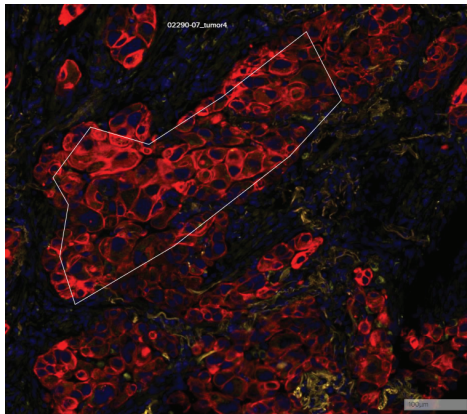

tumor.3

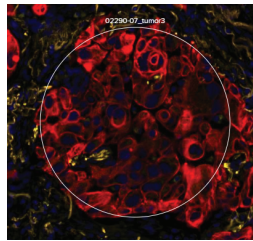

stroma.2

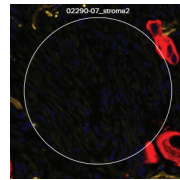

tumor.8

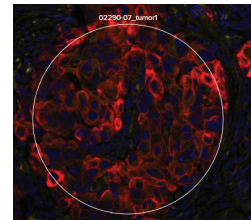

stroma.3

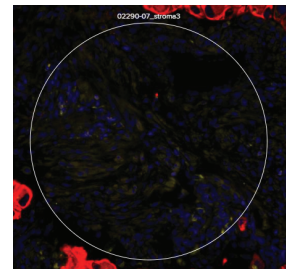

stroma.1

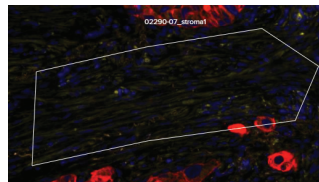

tumor.2

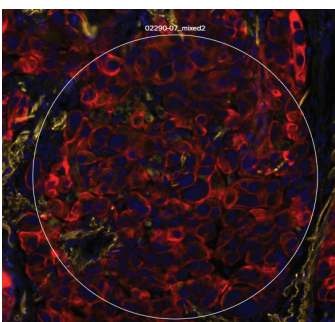

tumor.7

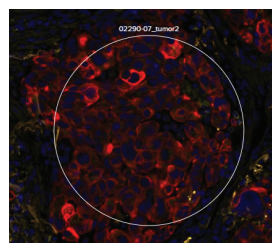

tumor.1

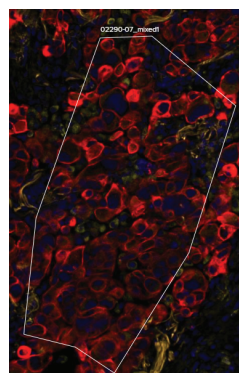

tumor.9

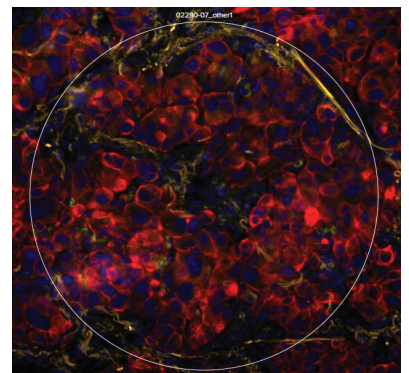



02671

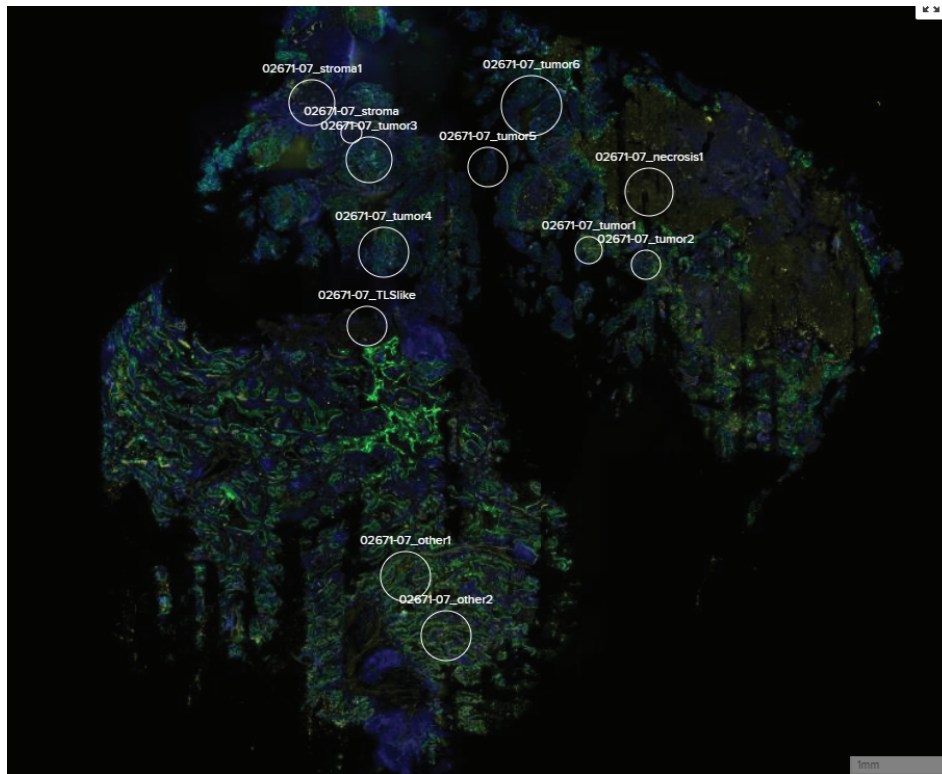

Green - PanCK  
Yellow - CD45  
Blue - Nuclei

tumor.6

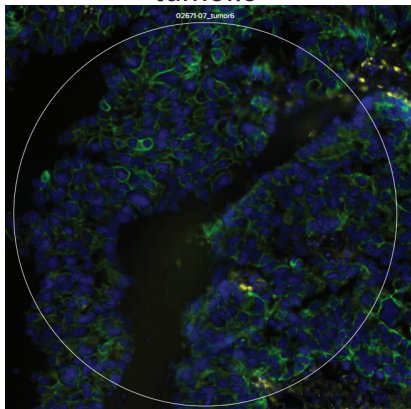

tumor.5

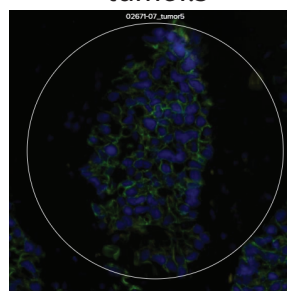

stroma.9

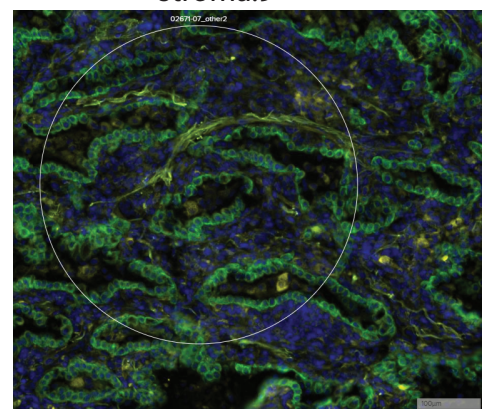

100  $\mu$ m

tumor.3

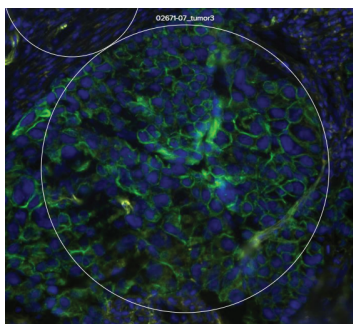

stroma.1

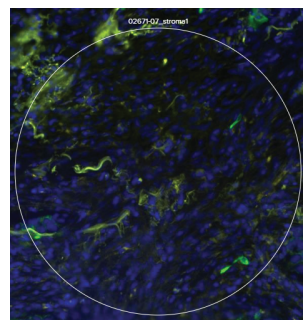

stroma.8

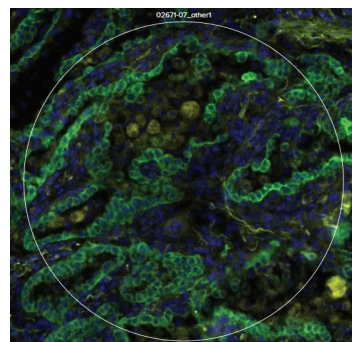

necrosis.1

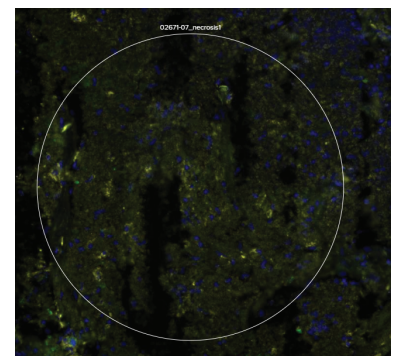

stroma.7

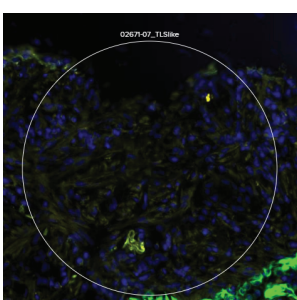

tumor.4

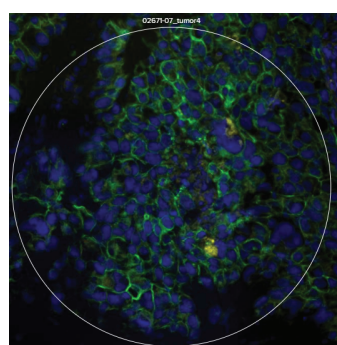

stroma

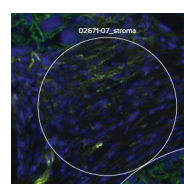

tumor.2

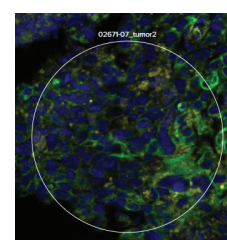

tumor.1

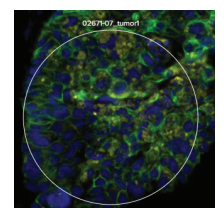



02672

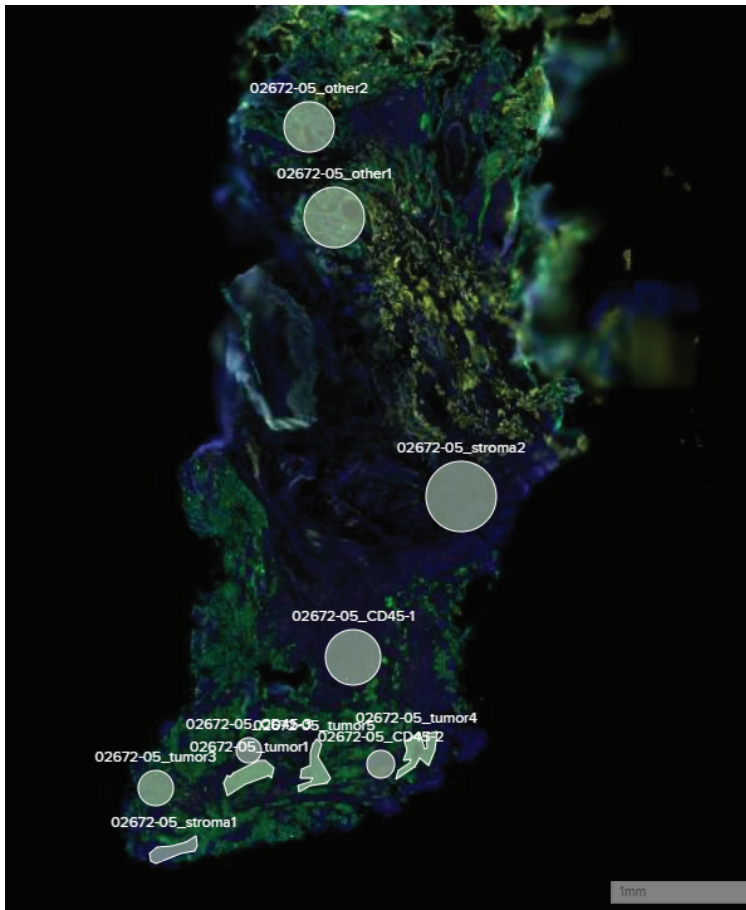

Green - PanCK  
Yellow - CD45  
Blue - Nuclei

1mm

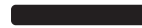

tumor.4

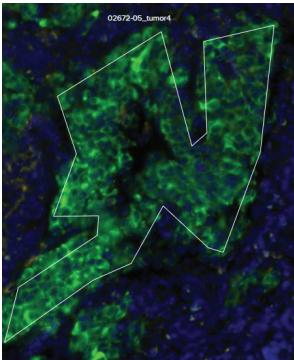

CD45.1

tumor.1

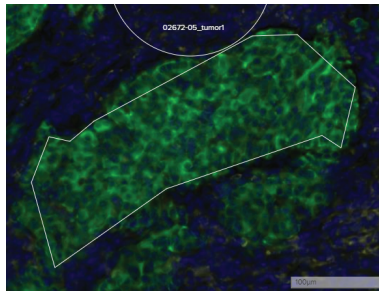

stroma.1

stroma.2

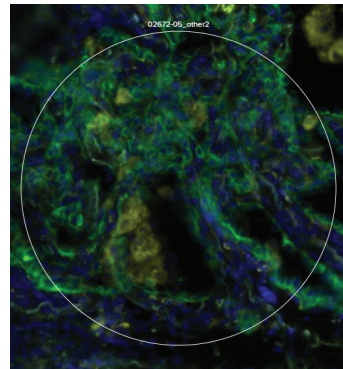

tumor.5

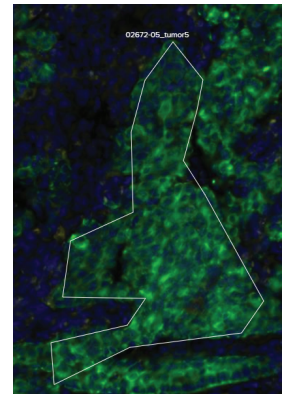

other.9

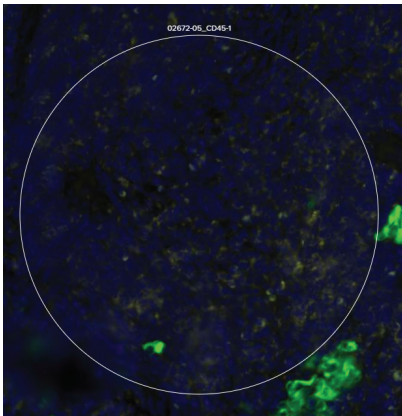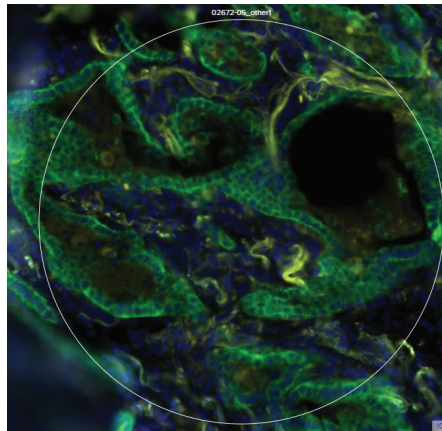

CD45.1

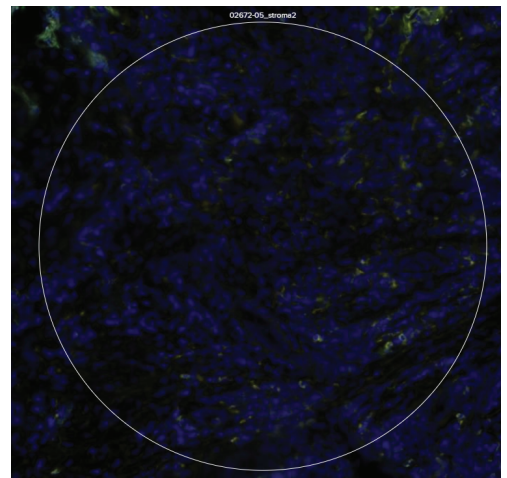

CD45.3

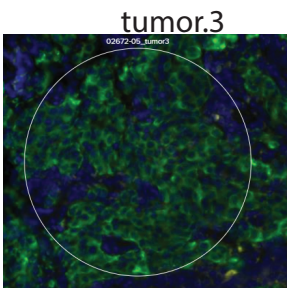

tumor.3

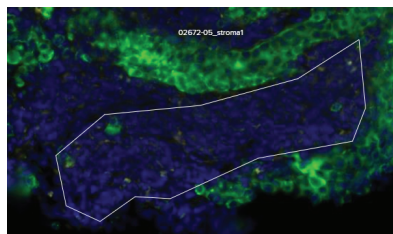

CD45.2

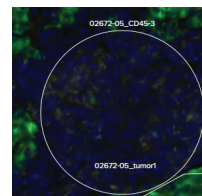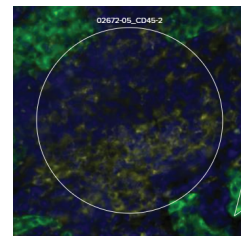

100 μm

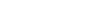



03023

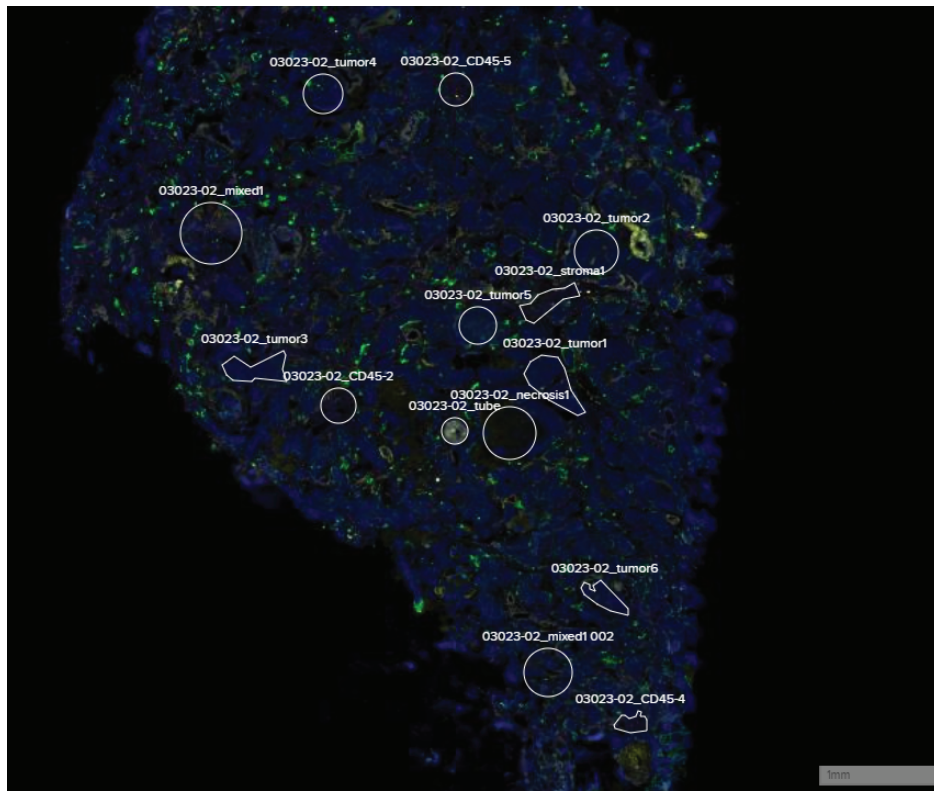

Green - PanCK  
Yellow - CD45  
Blue - Nuclei

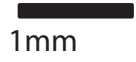

tumor.7

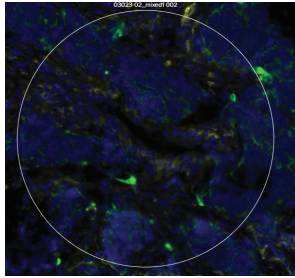

necrosis.1

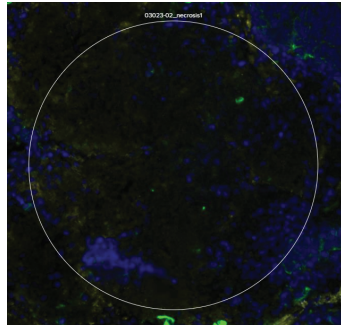

tumor.1

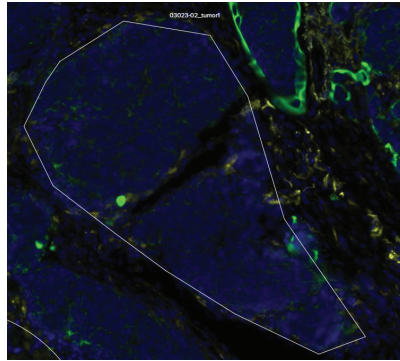

tumor.6

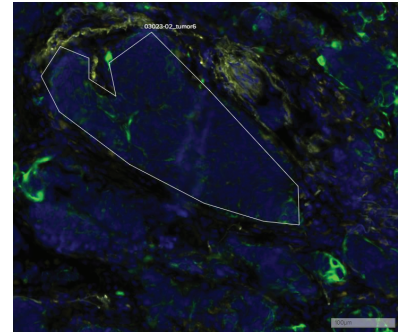

CD45.4

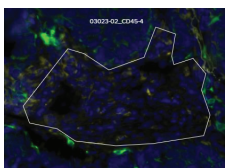

tube

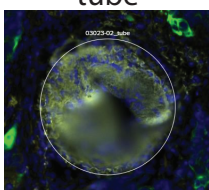

stroma.8

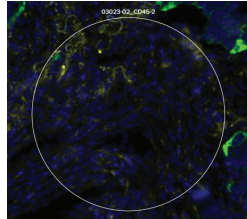

stroma.4

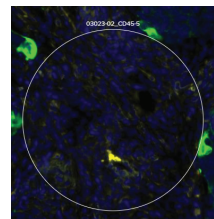

tumor.5

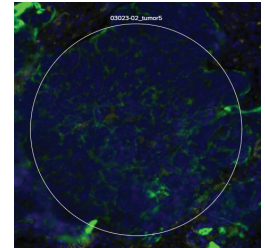

stroma.9

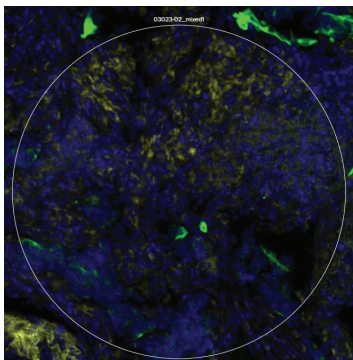

tumor.3

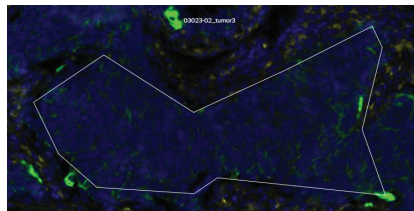

tumor.4

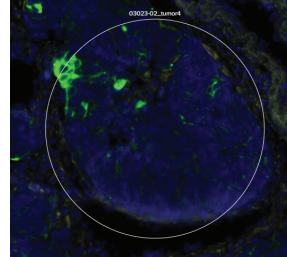

stroma.1

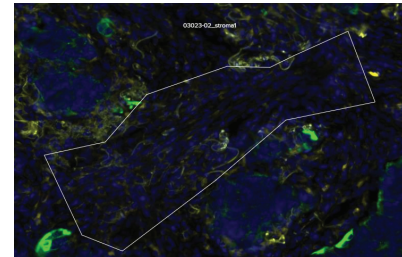

tumor.5

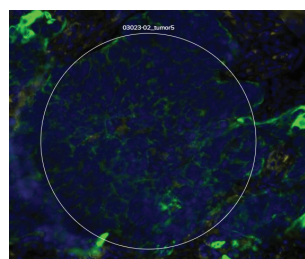

tumor.2

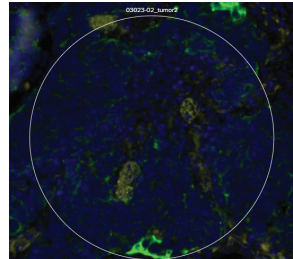

100 μm



03421

Green - PanCK  
Yellow - CD45  
Blue - Nuclei

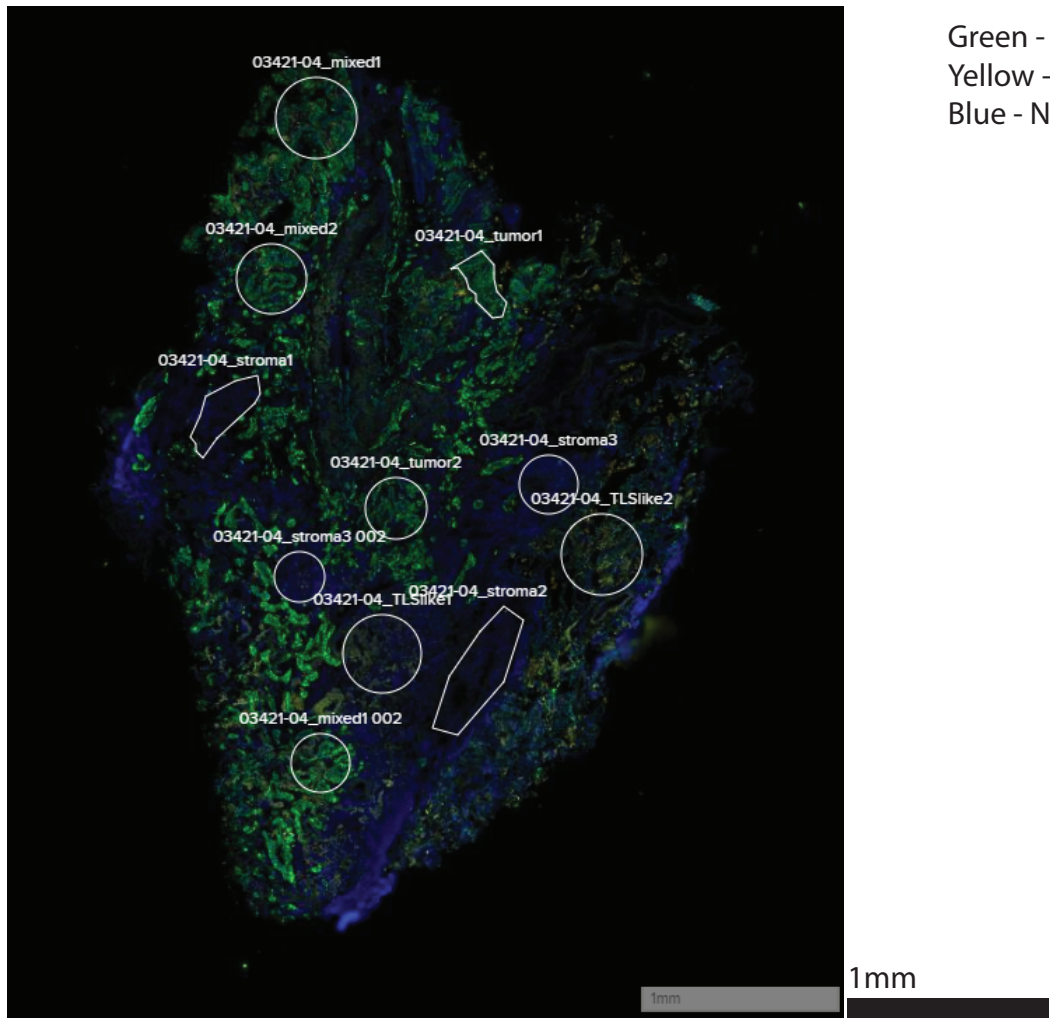

stroma.1

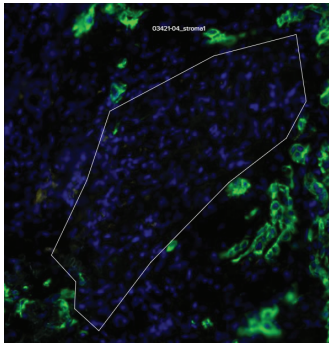

other.2

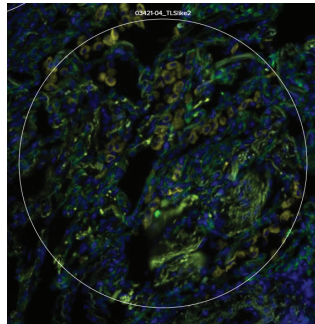

stroma.3

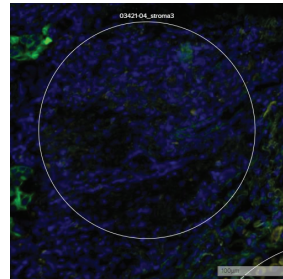

tumor.9

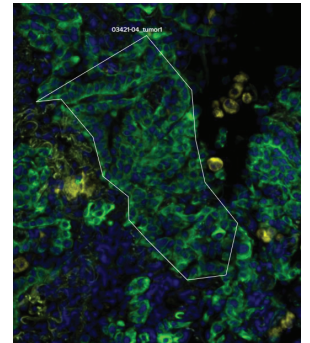

CD45.1

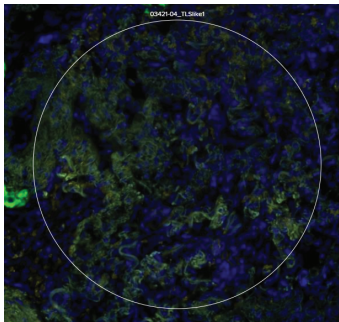

tumor.5

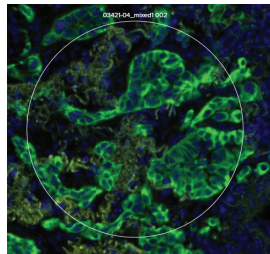

stroma.9

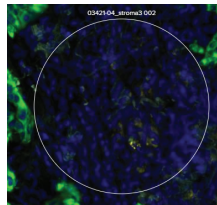

100 μm

tumor.1

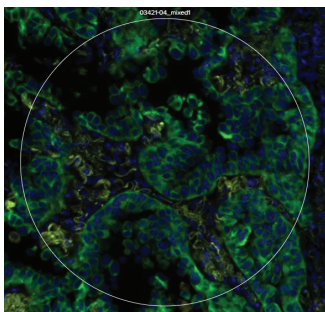

tumor.8

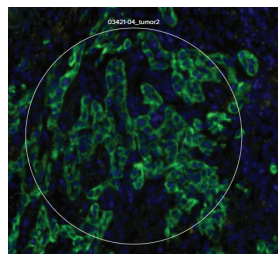

tumor.2

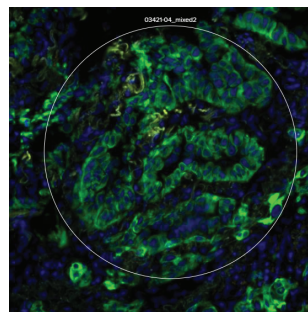

stroma.2

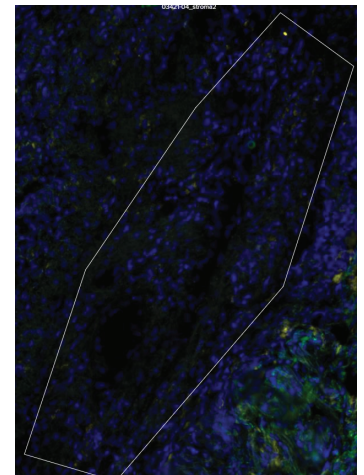

Supplement: 43018_2023_548_MOESM1_ESM.pdf [file 43018_2023_548_MOESM1_ESM.pdf]
